# Supplementary material
Source: publisher figshare collection journal article supplement (https://acs.figshare.com/ndownloader/files/10882118)
Supplement: Supplementary file 1 [file 10882118]

## Sheet: Inclusion list
Table S1. PRM assay to validate the results of whole-cell proteome.
Mass [m/z]	CS [z]	Polarity	Start [min]	End [min]	NCE	Comment	Protein accession
509.735	2	Positive			27	FFQEEYR (light)	TERG_07831T0
492.282	2	Positive			27	YGVGSLFLK (light)	TERG_07831T0
965.979	2	Positive	33	53	27	IWLDPSEVNEISTANSR (light)	TERG_00720T0
480.586	3	Positive	7	27	27	HLYHELYHLSK (light)	TERG_00720T0
473.777	2	Positive	0	18	27	ALVEHIHK (light)	TERG_00720T0
1090.03	2	Positive	21	41	27	VATDSETQDQQTPIGSFVQK (light)	TERG_02486T0
428.567	3	Positive	11	31	27	AVATHSFQLGPR (light)	TERG_02486T0
571.309	2	Positive	11	31	27	NTIIFSPHGR (light)	TERG_02486T0
658.826	2	Positive	8	28	27	GVQEEAGLAETGR (light)	TERG_02032T0
493.785	2	Positive	14	34	27	VLSVGDGIAR (light)	TERG_02032T0
725.381	2	Positive			27	TIQSLESSLSQTR (light)	TERG_01452T0
718.375	2	Positive			27	LDSVTQELFDLR (light)	TERG_01452T0
513.243	2	Positive	3	23	27	YESLSDPSK (light)	TERG_06963T0
616.001	3	Positive	33	53	27	HSEFISYPIYLHVLK (light)	TERG_06963T0
951.465	2	Positive	29	49	27	LVSLGLDVDEEETPEEK (light)	TERG_06963T0
615.333	2	Positive			27	ASQAAQINLSAR (light)	TERG_06399T0
487.306	2	Positive			27	STIASLLLR (light)	TERG_06399T0
454.217	2	Positive	1	21	27	EFAAQDAR (light)	TERG_03729T0
485.269	3	Positive	24	44	27	HVSAPSIAAGQFLR (light)	TERG_03729T0
453.727	2	Positive	24	44	27	YDWPGIR (light)	TERG_03729T0
677.378	2	Positive	27	47	27	GVAILGPLNDQTR (light)	TERG_01281T0
621.354	2	Positive	35	55	27	EATAFLALLHR (light)	TERG_01281T0
476.746	2	Positive	0	16	27	HNVPTAEGK (light)	TERG_01281T0
800.914	2	Positive	30	50	27	EELDAFLQPSPQVK (light)	TERG_06625T0
375.861	3	Positive	0	19	27	HYLGHELEK (light)	TERG_06625T0
809.399	2	Positive	34	54	27	GWDPVTGLGTPNFEK (light)	TERG_06625T0
504.935	3	Positive	31	51	27	QLSFEQIANHLGR (light)	TERG_05304T0
497.597	3	Positive	30	50	27	SEVAVAALFYGHAR (light)	TERG_05304T0
794.904	2	Positive	25	45	27	LYEIVQNYGQAYK (light)	TERG_05304T0
780.404	2	Positive	40	60	27	SVVYFVNWGIYGR (light)	TERG_00216T0
876.97	2	Positive	41	60	27	VLLSIGGWTYSANFPK (light)	TERG_00216T0
964.947	2	Positive	20	40	27	SQNSIEYPESQYENLK (light)	TERG_00216T0
671.39	2	Positive	26	46	27	VAAELGIQTLAAGK (light)	TERG_06780T0
976.501	2	Positive	40	60	27	SNVIATFDC[+57.0]PLGQAIAFK (light)	TERG_06780T0
958.981	2	Positive	38	58	27	YFQDYGNPPIGLYITR (light)	TERG_06780T0
470.748	2	Positive	21	41	27	LNFGTFNK (light)	TERG_04338T0
382.719	2	Positive	2	22	27	ANVYAVK (light)	TERG_04338T0
1054.53	2	Positive	40	60	27	C[+57.0]TDIFAPGLNIQSTWIGSK (light)	TERG_04338T0
540.81	2	Positive			27	TC[+57.0]LLIVFSK (light)	TERG_07578T0
892.102	3	Positive	44	60	27	GTFPEVYVPTVFENYVADVEVDGK (light)	TERG_07578T0
469.733	2	Positive	4	24	27	EVFESATR (light)	TERG_07578T0
580.832	2	Positive	40	60	27	IAGIALWNFR (light)	TERG_02012T0
636.83	2	Positive	41	60	27	AFFNWLYGVR (light)	TERG_02012T0
414.563	3	Positive	8	28	27	FAAHTGAVAIAGR (light)	TERG_00189T0
702.351	2	Positive	31	51	27	FTPGSFTNYITR (light)	TERG_00189T0
456.779	2	Positive			27	LIVVTDPR (light)	TERG_00189T0
389.216	2	Positive	16	36	27	FAGVDIR (light)	TERG_00633T0
487.26	3	Positive	9	29	27	VTGGGHTSQIYAIR (light)	TERG_00633T0
496.762	2	Positive	8	28	27	QALVQYDR (light)	TERG_00633T0
513.274	2	Positive			27	SFFGIGELR (light)	TERG_01574T0
555.962	3	Positive	15	35	27	FHIHPTSTVGELATR (light)	TERG_01574T0
791.708	3	Positive	31	51	27	ATAGDTHLGGQDFDTNLLDHFK (light)	TERG_01883T0
819.74	3	Positive	33	53	27	TFTTVVDNQQTVQFPVYQGER (light)	TERG_01883T0
513.728	2	Positive	1	21	27	SSDEAFSQR (light)	TERG_01883T0

## Sheet: transition
protein accession	peptide sequence	b/y	m/z
TERG_00720T0	IWLDPSEVNEISTANSR	b2	300.171
TERG_00720T0	IWLDPSEVNEISTANSR	b4	528.282
TERG_00720T0	IWLDPSEVNEISTANSR	y13	1403.68
TERG_00720T0	IWLDPSEVNEISTANSR	y12	1306.62
TERG_00720T0	IWLDPSEVNEISTANSR	y11	1219.59
TERG_00720T0	IWLDPSEVNEISTANSR	y10	1090.55
TERG_00720T0	IWLDPSEVNEISTANSR	y9	991.48
TERG_00720T0	IWLDPSEVNEISTANSR	y7	748.395
TERG_00720T0	IWLDPSEVNEISTANSR	y6	635.311
TERG_00720T0	ALVEHIHK	b2	185.128
TERG_00720T0	ALVEHIHK	b3	284.197
TERG_00720T0	ALVEHIHK	b5	550.298
TERG_00720T0	ALVEHIHK	y6	762.426
TERG_00720T0	ALVEHIHK	y5	663.357
TERG_00720T0	ALVEHIHK	y4	534.315
TERG_00720T0	ALVEHIHK	y3	397.256
TERG_00720T0	ALVEHIHK	y2	284.172
TERG_02486T0	VATDSETQDQQTPIGSFVQK	y13	1475.75
TERG_02486T0	VATDSETQDQQTPIGSFVQK	y12	1347.69
TERG_02486T0	VATDSETQDQQTPIGSFVQK	y11	1232.66
TERG_02486T0	VATDSETQDQQTPIGSFVQK	y10	1104.6
TERG_02486T0	VATDSETQDQQTPIGSFVQK	y9	976.546
TERG_02486T0	VATDSETQDQQTPIGSFVQK	y8	875.499
TERG_02486T0	VATDSETQDQQTPIGSFVQK	y6	665.362
TERG_02486T0	VATDSETQDQQTPIGSFVQK	y4	521.308
TERG_02486T0	VATDSETQDQQTPIGSFVQK	y3	374.24
TERG_02486T0	VATDSETQDQQTPIGSFVQK	y2	275.171
TERG_02486T0	NTIIFSPHGR	b3	329.182
TERG_02486T0	NTIIFSPHGR	y7	813.437
TERG_02486T0	NTIIFSPHGR	y6	700.353
TERG_02486T0	NTIIFSPHGR	y5	553.284
TERG_02032T0	GVQEEAGLAETGR	b2	157.097
TERG_02032T0	GVQEEAGLAETGR	b3	285.156
TERG_02032T0	GVQEEAGLAETGR	y10	1032.5
TERG_02032T0	GVQEEAGLAETGR	y9	903.453
TERG_02032T0	GVQEEAGLAETGR	y8	774.41
TERG_02032T0	GVQEEAGLAETGR	y7	703.373
TERG_02032T0	GVQEEAGLAETGR	y5	533.268
TERG_02032T0	GVQEEAGLAETGR	y4	462.231
TERG_02032T0	GVQEEAGLAETGR	y3	333.188
TERG_02032T0	VLSVGDGIAR	b2	213.16
TERG_02032T0	VLSVGDGIAR	b3	300.192
TERG_02032T0	VLSVGDGIAR	y9	887.495
TERG_02032T0	VLSVGDGIAR	y8	774.41
TERG_02032T0	VLSVGDGIAR	y7	687.378
TERG_02032T0	VLSVGDGIAR	y6	588.31
TERG_02032T0	VLSVGDGIAR	y5	531.289
TERG_02032T0	VLSVGDGIAR	y4	416.262
TERG_02032T0	VLSVGDGIAR	y2	246.156
TERG_06963T0	YESLSDPSK	b2	293.113
TERG_06963T0	YESLSDPSK	b3	380.145
TERG_06963T0	YESLSDPSK	y8	862.415
TERG_06963T0	YESLSDPSK	y7	733.373
TERG_06963T0	YESLSDPSK	y6	646.341
TERG_06963T0	YESLSDPSK	y5	533.257
TERG_06963T0	YESLSDPSK	y4	446.225
TERG_06963T0	YESLSDPSK	y3	331.198
TERG_06963T0	YESLSDPSK	y2	234.145
TERG_06963T0	LVSLGLDVDEEETPEEK	b2	213.16
TERG_06963T0	LVSLGLDVDEEETPEEK	b3	300.192
TERG_06963T0	LVSLGLDVDEEETPEEK	y13	1489.65
TERG_06963T0	LVSLGLDVDEEETPEEK	y12	1432.63
TERG_06963T0	LVSLGLDVDEEETPEEK	y11	1319.55
TERG_06963T0	LVSLGLDVDEEETPEEK	y10	1204.52
TERG_06963T0	LVSLGLDVDEEETPEEK	y9	1105.45
TERG_06963T0	LVSLGLDVDEEETPEEK	y8	990.426
TERG_06963T0	LVSLGLDVDEEETPEEK	y5	603.298
TERG_06963T0	LVSLGLDVDEEETPEEK	y4	502.251
TERG_01281T0	GVAILGPLNDQTR	b2	157.097
TERG_01281T0	GVAILGPLNDQTR	b3	228.134
TERG_01281T0	GVAILGPLNDQTR	b4	341.218
TERG_01281T0	GVAILGPLNDQTR	y10	1126.62
TERG_01281T0	GVAILGPLNDQTR	y9	1013.54
TERG_01281T0	GVAILGPLNDQTR	y8	900.453
TERG_01281T0	GVAILGPLNDQTR	y7	843.432
TERG_01281T0	GVAILGPLNDQTR	y5	633.295
TERG_01281T0	HNVPTAEGK	b2	252.109
TERG_01281T0	HNVPTAEGK	b3	351.178
TERG_01281T0	HNVPTAEGK	b6	620.315
TERG_01281T0	HNVPTAEGK	y8	815.426
TERG_01281T0	HNVPTAEGK	y7	701.383
TERG_01281T0	HNVPTAEGK	y6	602.314
TERG_01281T0	HNVPTAEGK	y4	404.214
TERG_01281T0	HNVPTAEGK	y3	333.177
TERG_06625T0	EELDAFLQPSPQVK	b2	259.092
TERG_06625T0	EELDAFLQPSPQVK	y10	1114.63
TERG_06625T0	EELDAFLQPSPQVK	y9	1043.59
TERG_06625T0	EELDAFLQPSPQVK	y6	655.377
TERG_06625T0	EELDAFLQPSPQVK	y4	471.293
TERG_06625T0	GWDPVTGLGTPNFEK	b2	244.108
TERG_06625T0	GWDPVTGLGTPNFEK	b3	359.135
TERG_06625T0	GWDPVTGLGTPNFEK	y12	1259.66
TERG_06625T0	GWDPVTGLGTPNFEK	y11	1162.61
TERG_06625T0	GWDPVTGLGTPNFEK	y10	1063.54
TERG_06625T0	GWDPVTGLGTPNFEK	y9	962.494
TERG_06625T0	GWDPVTGLGTPNFEK	y5	634.32
TERG_05304T0	SEVAVAALFYGHAR	b2	217.082
TERG_05304T0	SEVAVAALFYGHAR	b3	316.15
TERG_05304T0	SEVAVAALFYGHAR	y10	1104.59
TERG_05304T0	SEVAVAALFYGHAR	y9	1005.53
TERG_05304T0	SEVAVAALFYGHAR	y8	934.489
TERG_05304T0	SEVAVAALFYGHAR	y7	863.452
TERG_05304T0	SEVAVAALFYGHAR	y5	603.3
TERG_05304T0	LYEIVQNYGQAYK	b2	277.155
TERG_05304T0	LYEIVQNYGQAYK	b3	406.197
TERG_05304T0	LYEIVQNYGQAYK	y11	1312.65
TERG_05304T0	LYEIVQNYGQAYK	y10	1183.61
TERG_05304T0	LYEIVQNYGQAYK	y9	1070.53
TERG_05304T0	LYEIVQNYGQAYK	y8	971.458
TERG_05304T0	LYEIVQNYGQAYK	y7	843.4
TERG_05304T0	LYEIVQNYGQAYK	y6	729.357
TERG_05304T0	LYEIVQNYGQAYK	y5	566.293
TERG_00216T0	SVVYFVNWGIYGR	b2	187.108
TERG_00216T0	SVVYFVNWGIYGR	b3	286.176
TERG_00216T0	SVVYFVNWGIYGR	y11	1373.7
TERG_00216T0	SVVYFVNWGIYGR	y10	1274.63
TERG_00216T0	SVVYFVNWGIYGR	y9	1111.57
TERG_00216T0	SVVYFVNWGIYGR	y8	964.5
TERG_00216T0	SVVYFVNWGIYGR	y7	865.432
TERG_00216T0	SVVYFVNWGIYGR	y6	751.389
TERG_00216T0	SVVYFVNWGIYGR	y5	565.309
TERG_00216T0	SVVYFVNWGIYGR	y3	395.204
TERG_00216T0	VLLSIGGWTYSANFPK	b2	213.16
TERG_00216T0	VLLSIGGWTYSANFPK	b4	413.276
TERG_00216T0	VLLSIGGWTYSANFPK	y13	1427.7
TERG_00216T0	VLLSIGGWTYSANFPK	y12	1340.66
TERG_00216T0	VLLSIGGWTYSANFPK	y11	1227.58
TERG_00216T0	VLLSIGGWTYSANFPK	y10	1170.56
TERG_00216T0	VLLSIGGWTYSANFPK	y8	927.457
TERG_00216T0	VLLSIGGWTYSANFPK	y7	826.409
TERG_00216T0	VLLSIGGWTYSANFPK	y6	663.346
TERG_00216T0	VLLSIGGWTYSANFPK	y2	244.166
TERG_06780T0	VAAELGIQTLAAGK	b2	171.113
TERG_06780T0	VAAELGIQTLAAGK	b3	242.15
TERG_06780T0	VAAELGIQTLAAGK	b4	371.193
TERG_06780T0	VAAELGIQTLAAGK	y12	1171.67
TERG_06780T0	VAAELGIQTLAAGK	y10	971.588
TERG_06780T0	VAAELGIQTLAAGK	y9	858.504
TERG_06780T0	VAAELGIQTLAAGK	y7	688.399
TERG_06780T0	VAAELGIQTLAAGK	y6	560.34
TERG_06780T0	VAAELGIQTLAAGK	y4	346.208
TERG_06780T0	VAAELGIQTLAAGK	y2	204.134
TERG_06780T0	YFQDYGNPPIGLYITR	b2	311.139
TERG_06780T0	YFQDYGNPPIGLYITR	b4	554.225
TERG_06780T0	YFQDYGNPPIGLYITR	y13	1478.76
TERG_06780T0	YFQDYGNPPIGLYITR	y12	1363.74
TERG_06780T0	YFQDYGNPPIGLYITR	y11	1200.67
TERG_06780T0	YFQDYGNPPIGLYITR	y10	1143.65
TERG_06780T0	YFQDYGNPPIGLYITR	y9	1029.61
TERG_06780T0	YFQDYGNPPIGLYITR	y8	932.556
TERG_06780T0	YFQDYGNPPIGLYITR	y6	722.42
TERG_06780T0	YFQDYGNPPIGLYITR	y4	552.314
TERG_04338T0	LNFGTFNK	b2	228.134
TERG_04338T0	LNFGTFNK	y7	827.405
TERG_04338T0	LNFGTFNK	y6	713.362
TERG_04338T0	LNFGTFNK	y5	566.293
TERG_04338T0	LNFGTFNK	y4	509.272
TERG_04338T0	LNFGTFNK	y3	408.224
TERG_04338T0	LNFGTFNK	y2	261.156
TERG_04338T0	ANVYAVK	b2	186.087
TERG_04338T0	ANVYAVK	y5	579.35
TERG_04338T0	ANVYAVK	y4	480.282
TERG_04338T0	ANVYAVK	y3	317.218
TERG_04338T0	ANVYAVK	y2	246.181
TERG_00189T0	FAAHTGAVAIAGR	b6	585.278
TERG_00189T0	FAAHTGAVAIAGR	b7	656.315
TERG_00189T0	FAAHTGAVAIAGR	b8	755.383
TERG_00189T0	FAAHTGAVAIAGR	b9	826.421
TERG_00189T0	FAAHTGAVAIAGR	y9	815.473
TERG_00189T0	FAAHTGAVAIAGR	y5	487.299
TERG_00189T0	FAAHTGAVAIAGR	y4	416.262
TERG_00189T0	FAAHTGAVAIAGR	y3	303.178
TERG_00189T0	FAAHTGAVAIAGR	y2	232.14
TERG_00189T0	FAAHTGAVAIAGR	y1	175.119
TERG_00189T0	LIVVTDPR	b2	227.175
TERG_00189T0	LIVVTDPR	b3	326.244
TERG_00189T0	LIVVTDPR	y6	686.383
TERG_00189T0	LIVVTDPR	y5	587.315
TERG_00189T0	LIVVTDPR	y4	488.246
TERG_00189T0	LIVVTDPR	y2	272.172
TERG_00189T0	LIVVTDPR	y1	175.119
TERG_00633T0	VTGGGHTSQIYAIR	b2	201.123
TERG_00633T0	VTGGGHTSQIYAIR	y9	1088.58
TERG_00633T0	VTGGGHTSQIYAIR	y8	951.526
TERG_00633T0	VTGGGHTSQIYAIR	y7	850.478
TERG_00633T0	VTGGGHTSQIYAIR	y5	635.388
TERG_00633T0	VTGGGHTSQIYAIR	y4	522.303
TERG_00633T0	VTGGGHTSQIYAIR	y1	175.119
TERG_00633T0	QALVQYDR	b2	200.103
TERG_00633T0	QALVQYDR	b3	313.187
TERG_00633T0	QALVQYDR	y7	864.457
TERG_00633T0	QALVQYDR	y6	793.42
TERG_00633T0	QALVQYDR	y5	680.336
TERG_00633T0	QALVQYDR	y4	581.268
TERG_00633T0	QALVQYDR	y3	453.209
TERG_00633T0	QALVQYDR	y2	290.146
TERG_00633T0	QALVQYDR	y1	175.119
TERG_01574T0	SFFGIGELR	b3	382.176
TERG_01574T0	SFFGIGELR	y7	791.441
TERG_01574T0	SFFGIGELR	y6	644.373
TERG_01574T0	SFFGIGELR	y5	587.351
TERG_01574T0	SFFGIGELR	y4	474.267
TERG_01574T0	SFFGIGELR	y3	417.246
TERG_01574T0	FHIHPTSTVGELATR	b2	285.135
TERG_01574T0	FHIHPTSTVGELATR	b3	398.219
TERG_01574T0	FHIHPTSTVGELATR	b4	535.278
TERG_01574T0	FHIHPTSTVGELATR	y9	933.5
TERG_01574T0	FHIHPTSTVGELATR	y7	745.42
TERG_01574T0	FHIHPTSTVGELATR	y6	646.352
TERG_01574T0	FHIHPTSTVGELATR	y4	460.288
TERG_01883T0	ATAGDTHLGGQDFDTNLLDHFK	b2	173.092
TERG_01883T0	ATAGDTHLGGQDFDTNLLDHFK	b12	1124.5
TERG_01883T0	ATAGDTHLGGQDFDTNLLDHFK	y10	1249.62
TERG_01883T0	ATAGDTHLGGQDFDTNLLDHFK	y8	987.526
TERG_01883T0	ATAGDTHLGGQDFDTNLLDHFK	y6	772.435
TERG_01883T0	ATAGDTHLGGQDFDTNLLDHFK	y5	659.351
TERG_01883T0	ATAGDTHLGGQDFDTNLLDHFK	y4	546.267
TERG_01883T0	ATAGDTHLGGQDFDTNLLDHFK	y3	431.24
TERG_01883T0	SSDEAFSQR	b2	175.071
TERG_01883T0	SSDEAFSQR	b3	290.098
TERG_01883T0	SSDEAFSQR	y8	939.417
TERG_01883T0	SSDEAFSQR	y7	852.385
TERG_01883T0	SSDEAFSQR	y6	737.358
TERG_01883T0	SSDEAFSQR	y5	608.315
TERG_01883T0	SSDEAFSQR	y4	537.278
TERG_01883T0	SSDEAFSQR	y3	390.21
TERG_01883T0	SSDEAFSQR	y2	303.178
TERG_01883T0	SSDEAFSQR	y1	175.119

## Sheet: results
Protein Accession	Peptide sequence	Missed Cleavages	Average Measured Retention Time	Conidia_1 Normalized Area	Conidia_2 Normalized Area	Conidia_3 Normalized Area	Mycelia_1 Normalized Area	Mycelia_2 Normalized Area	Mycelia_3 Normalized Area	Conidia_1	Conidia_2	Conidia_3	Mycelia_1	Mycelia_2	Mycelia_3
TERG_00189T0	FAAHTGAVAIAGR	0	20.13	3207600000	2833600000	2700000000	5658200000	6361200000	6451700000	0.707239	0.624776	0.595319	1.24757	1.40257	1.42253
TERG_00189T0	LIVVTDPR	0	26.16	6654800000	6598700000	6778100000	12657000000	12897000000	12820000000	0.683647	0.677884	0.696313	1.30025	1.32491	1.317
TERG_00633T0	VTGGGHTSQIYAIR	0	21.21	892400000	1092600000	820720000	1696900000	1319200000	1928500000	0.690862	0.845849	0.63537	1.31367	1.02127	1.49297
TERG_00633T0	QALVQYDR	0	20.12	1384600000	1450000000	1389700000	2806900000	2866100000	3075600000	0.640381	0.670629	0.64274	1.2982	1.32558	1.42247
TERG_00720T0	IWLDPSEVNEISTANSR	0	45.06	80197000	72453000	72158000	1251400000	1263000000	1301600000	0.119081	0.107582	0.107144	1.85814	1.87537	1.93268
TERG_00720T0	ALVEHIHK	0	10.68	187460000	147460000	152460000	1265000000	1220000000	1195500000	0.269864	0.212281	0.219478	1.82107	1.75629	1.72102
TERG_01574T0	SFFGIGELR	0	47.37	11261000	11245000	11264000	98800000	100490000	97944000	0.204124	0.203834	0.204179	1.79091	1.82155	1.7754
TERG_01574T0	FHIHPTSTVGELATR	0	26.93	16440000	16807000	14073000	115780000	127360000	117100000	0.242026	0.247429	0.207179	1.70449	1.87496	1.72392
TERG_01883T0	ATAGDTHLGGQDFDTNLLDHFK	0	43.21	94834000	83580000	77888000	220230000	299630000	239690000	0.560125	0.493655	0.460036	1.30076	1.76973	1.4157
TERG_01883T0	SSDEAFSQR	0	13.4	1203600000	1326500000	801890000	3706800000	3774300000	2989600000	0.523202	0.576627	0.34858	1.61134	1.64068	1.29957
TERG_02032T0	GVQEEAGLAETGR	0	21.26	1280200000	1088700000	1067100000	4240800000	3877800000	4668700000	0.473467	0.402643	0.394655	1.56841	1.43416	1.72666
TERG_02032T0	VLSVGDGIAR	0	26.58	4049500000	3596700000	4016500000	12437000000	11574000000	11282000000	0.517445	0.459586	0.513228	1.5892	1.47893	1.44161
TERG_02486T0	VATDSETQDQQTPIGSFVQK	0	33.79	18580000	18893000	18288000	70217000	74541000	60087000	0.427772	0.434978	0.421049	1.61662	1.71618	1.3834
TERG_02486T0	NTIIFSPHGR	0	23.1	12274000	14214000	15435000	70460000	60916000	60621000	0.314826	0.364586	0.395905	1.80728	1.56248	1.55492
TERG_06963T0	YESLSDPSK	0	15.8	689250000	744940000	782410000	3294300000	3465100000	3288900000	0.337182	0.364425	0.382756	1.61157	1.69513	1.60893
TERG_06963T0	LVSLGLDVDEEETPEEK	0	40.25	923010000	925290000	913940000	4740000000	5392400000	4398300000	0.32025	0.321041	0.317103	1.6446	1.87096	1.52604
TERG_01281T0	GVAILGPLNDQTR	0	38.6	1897400000	1918400000	1772400000	142760000	133250000	145620000	1.8943	1.91526	1.7695	0.142526	0.133032	0.145382
TERG_01281T0	HNVPTAEGK	0	7.29	1212100000	1251800000	1224400000	82395000	87331000	55213000	1.85846	1.91933	1.87732	0.126333	0.133901	0.0846557
TERG_04338T0	LNFGTFNK	0	33.26	741380000	776840000	885600000	311290000	310940000	289110000	1.3418	1.40598	1.60282	0.563394	0.56276	0.523251
TERG_04338T0	ANVYAVK	0	14.64	445670000	333750000	460770000	188030000	170270000	180050000	1.50349	1.12592	1.55443	0.634329	0.574415	0.607408
TERG_05304T0	SEVAVAALFYGHAR	0	42.01	827040000	897740000	735440000	29300000	40010000	35297000	1.93473	2.10012	1.72044	0.0685426	0.093597	0.0825717
TERG_05304T0	LYEIVQNYGQAYK	0	37.03	1008100000	994680000	973150000	46206000	46316000	38081000	1.94706	1.92114	1.87956	0.0892429	0.0894554	0.0735502
TERG_06625T0	EELDAFLQPSPQVK	0	42.38	77872000	87731000	81859000	5048700	5230500	4561800	1.78127	2.00679	1.87247	0.115486	0.119644	0.104348
TERG_06625T0	GWDPVTGLGTPNFEK	0	46.02	337660000	236890000	291440000	8976000	9479800	9344600	2.26671	1.59024	1.95643	0.0602557	0.0636377	0.0627301
TERG_00216T0	SVVYFVNWGIYGR	0	51.25	503710000	655290000	638140000				0.840853	1.09389	1.06526	0	0	0
TERG_00216T0	VLLSIGGWTYSANFPK	0	51.4	647310000	708310000	643010000				0.971631	1.06319	0.965176	0	0	0
TERG_06780T0	VAAELGIQTLAAGK	0	37.83	9111700000	9408600000	8568700000				1.00908	1.04197	0.94895	0	0	0
TERG_06780T0	YFQDYGNPPIGLYITR	0	48.44	9421100000	11229000000	9075600000				0.950804	1.13326	0.915935	0	0	0
